# Supplementary material for: Drotrecogin alfa (activated): real-life use and outcomes for the UK
Source: PubMed Central journal article supplement (PMC2447613; doi:10.1186/cc6879), 2008-04-22
Supplement: cc6879-S3.pdf [file cc6879-S3.pdf]

## Balance between admissions receiving drotrecogin alfa (activated) (DrotAA) and matched controls

| Control pool                                           | (a) Historic, same unit |              | (b) Contemporaneous, same unit |                | (c) Contemporaneous, non-DrotAA unit |              | (d) Contemporaneous, DrotAA unit prior to first use |                |
|--------------------------------------------------------|-------------------------|--------------|--------------------------------|----------------|--------------------------------------|--------------|-----------------------------------------------------|----------------|
| Matched group                                          | DrotAA                  | Control      | DrotAA                         | Control        | DrotAA                               | Control      | DrotAA                                              | Control        |
| <b>Individual matching</b>                             | <b>N=609</b>            | <b>N=609</b> | <b>N=764</b>                   | <b>N=764</b>   | <b>N=666</b>                         | <b>N=666</b> | <b>N=922</b>                                        | <b>N=922</b>   |
| Age <sup>a</sup> , mean (SD)                           | 61.7 (14.0)             | 62.1 (14.0)  | 61.0 (14.9)                    | 61.8 (14.9)    | 59.4 (15.2)                          | 59.6 (15.2)  | 60.0 (15.4)                                         | 60.9 (15.0)    |
| Sex, n (%)                                             |                         |              |                                |                |                                      |              |                                                     |                |
| Female                                                 | 299 (49.1)              | 280 (46.0)   | 369 (48.3)                     | 359 (47.0)     | 324 (48.6)                           | 330 (49.5)   | 454 (49.2)                                          | 425 (46.1)     |
| Male                                                   | 310 (50.9)              | 329 (54.0)   | 395 (51.7)                     | 405 (53.0)     | 342 (51.4)                           | 336 (50.5)   | 468 (50.8)                                          | 497 (53.9)     |
| Ventilated <sup>b</sup> , n (%)                        | 572 (93.9)              | 554 (91.0)   | 712 (93.2)                     | 663 (86.8)     | 620 (93.1)                           | 555 (83.3)   | 858 (93.1)                                          | 805 (87.3)     |
| Number of organ systems failing <sup>b,c</sup> , n (%) |                         |              |                                |                |                                      |              |                                                     |                |
| 2                                                      | 142 (23.3)              | 142 (23.3)   | 167 (21.9)                     | 167 (21.9)     | 139 (20.9)                           | 139 (20.9)   | 185 (20.1)                                          | 185 (20.1)     |
| 3                                                      | 262 (43.0)              | 262 (43.0)   | 339 (44.4)                     | 339 (44.4)     | 289 (43.4)                           | 289 (43.4)   | 389 (42.2)                                          | 389 (42.2)     |
| 4                                                      | 174 (28.6)              | 174 (28.6)   | 229 (30.0)                     | 229 (30.0)     | 205 (30.8)                           | 205 (30.8)   | 285 (30.9)                                          | 285 (30.9)     |
| 5                                                      | 31 (5.1)                | 31 (5.1)     | 29 (3.8)                       | 29 (3.8)       | 33 (5.0)                             | 33 (5.0)     | 63 (6.8)                                            | 63 (6.8)       |
| APACHE II, mean (SD)                                   | 18.1 (5.8)              | 18.1 (6.2)   | 18.2 (6.0)                     | 17.5 (6.2)     | 18.4 (6.3)                           | 19.2 (6.6)   | 18.4 (6.2)                                          | 18.2 (6.0)     |
| APS Score                                              | 22.3 (6.3)              | 22.6 (6.8)   | 22.3 (6.5)                     | 22.0 (6.8)     | 22.3 (6.7)                           | 23.3 (7.3)   | 22.4 (6.6)                                          | 22.6 (6.8)     |
| ICNARC physiology score <sup>1</sup> , mean (SD)       | 29.4 (7.9)              | 28.8 (7.4)   | 29.3 (7.7)                     | 28.5 (7.7)     | 29.5 (7.8)                           | 29.0 (7.5)   | 29.8 (8.1)                                          | 29.4 (7.7)     |
| <b>Propensity matching</b>                             | <b>N=929</b>            | <b>N=929</b> | <b>N=1,049</b>                 | <b>N=1,049</b> | <b>N=818</b>                         | <b>N=818</b> | <b>N=1,053</b>                                      | <b>N=1,053</b> |
| Age <sup>d</sup> , mean (SD)                           | 59.0 (16.2)             | 58.3 (16.7)  | 58.5 (16.2)                    | 57.4 (16.1)    | 58.3 (16.2)                          | 57.6 (15.8)  | 58.6 (16.2)                                         | 58.3 (15.5)    |
| Sex <sup>d</sup> , n (%)                               |                         |              |                                |                |                                      |              |                                                     |                |
| Female                                                 | 465 (50.1)              | 484 (52.1)   | 520 (49.6)                     | 531 (50.6)     | 400 (48.9)                           | 448 (54.8)   | 524 (49.8)                                          | 543 (51.6)     |
| Male                                                   | 464 (49.9)              | 445 (47.9)   | 529 (50.4)                     | 518 (49.4)     | 418 (51.1)                           | 370 (45.2)   | 529 (50.2)                                          | 510 (48.4)     |
| Ventilated <sup>b</sup> , n (%)                        | 864 (93.0)              | 850 (91.5)   | 970 (92.5)                     | 930 (88.7)     | 758 (92.7)                           | 665 (81.3)   | 974 (92.5)                                          | 926 (87.9)     |
| Number of organ systems failing <sup>b,d</sup> , n (%) |                         |              |                                |                |                                      |              |                                                     |                |
| 2                                                      | 173 (18.6)              | 206 (22.2)   | 193 (18.4)                     | 210 (20.0)     | 148 (18.1)                           | 136 (16.6)   | 193 (18.3)                                          | 187 (17.8)     |
| 3                                                      | 361 (38.9)              | 370 (39.8)   | 418 (39.8)                     | 436 (41.6)     | 329 (40.2)                           | 351 (42.9)   | 421 (40.0)                                          | 457 (43.4)     |
| 4                                                      | 314 (33.8)              | 280 (30.1)   | 352 (33.6)                     | 317 (30.2)     | 272 (33.3)                           | 273 (33.4)   | 356 (33.8)                                          | 289 (27.4)     |
| 5                                                      | 81 (8.7)                | 73 (7.9)     | 86 (8.2)                       | 86 (8.2)       | 69 (8.4)                             | 58 (7.1)     | 83 (7.9)                                            | 120 (11.4)     |
| APACHE II, mean (SD)                                   | 18.9 (6.3)              | 18.3 (6.2)   | 18.8 (6.4)                     | 18.2 (6.3)     | 18.8 (6.5)                           | 20.0 (6.8)   | 18.8 (6.4)                                          | 17.8 (5.6)     |
| APS Score                                              | 22.8 (6.7)              | 21.9 (6.6)   | 22.6 (6.7)                     | 21.9 (6.8)     | 22.6 (6.9)                           | 23.7 (6.9)   | 22.7 (6.8)                                          | 21.6 (6.1)     |
| ICNARC physiology score <sup>d</sup> , mean (SD)       | 30.5 (8.4)              | 29.6 (7.8)   | 30.4 (8.4)                     | 29.7 (8.1)     | 30.3 (8.2)                           | 29.6 (7.8)   | 30.4 (8.4)                                          | 29.5 (7.6)     |

APACHE: Acute Physiology And Chronic Health Evaluation; APS: acute physiology score; ICNARC: Intensive Care National Audit & Research Centre; SD: standard deviation

<sup>a</sup> Included in matching procedure

<sup>b</sup> During first 24 hours in the critical care unit

<sup>c</sup> Perfect balance ensured by matching procedure

<sup>d</sup> Included in propensity model
